# Supplementary material
Source: MDPI journal article supplement (https://www.mdpi.com/2073-4441/13/17/2340)
Supplement: s1 [file s1]

# **Emerging contaminants: an overview of recent trends for their treatment and management for light driven processes**

B.C.Y. Lee<sup>#</sup>, F.Y.Lim<sup>#</sup>, W.H. Loh<sup>#</sup>, S.L. Ong and J.Y. Hu<sup>\*</sup>

Department of Civil & Environmental Engineering, Faculty of Engineering, National University of Singapore, Block E1A, #07-01, 1 Engineering Drive 2, Singapore 117576

<sup>#</sup>: These authors contributed equally to this work

<sup>\*</sup>: Corresponding author, Email: [ceehujy@nus.edu.sg](mailto:ceehujy@nus.edu.sg)

**Supplementary S1 An illustrated example of similar chemical structure of CECs with similar photodegradation performance**

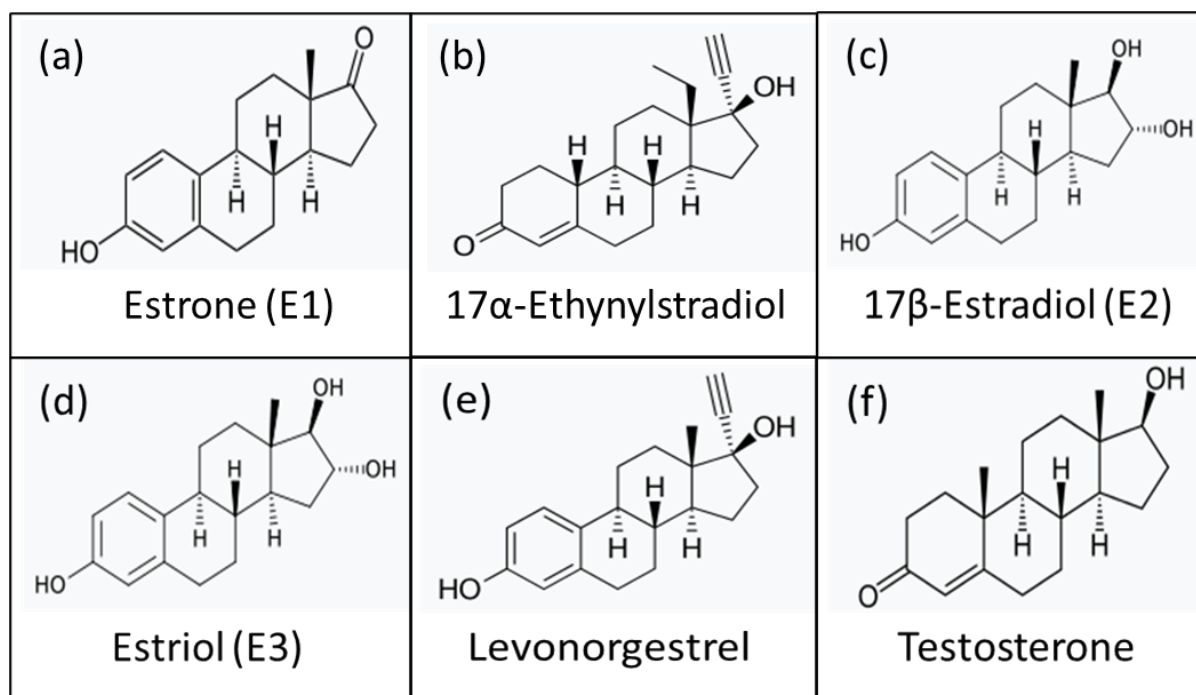

**Figure S1.** CECs with a similar chemical structure Estrone (a), 17α-Ethynylstradiol (b), 17β-Estradiol (c), Estriol (d), Levonorgestrel (e), Testosterone (f).

These CECs have similar chemical structure and hence likely to have similar degradation performance. X. Ma. et al. reported that Estrone (E1), 17β-estradiol (E2) and 17α-ethinyl estradiol had similar degradation performance using UVC/H<sub>2</sub>O<sub>2</sub> system [1]. The  $k_{OH\cdot}$  (L.mol<sup>-1</sup>.s<sup>-1</sup>) of 17β-Estradiol, Estrone, 17α-Ethinylestradiol and 17α-Estradiol were also reported to be similar  $\sim 6.0 \times 10^9$  [2], indicating that the photodegradation performance by OH $\cdot$  system should be similar. It is however noted that 17α-ethinyl estradiol has a minute higher photodegradation performance than Estrone (E1), 17β-estradiol (E2) and Estriol (E3), due to presence of the ethynyl group, which absorbs UV light easily[3]. Nonetheless, the chemical structure of CECs can be used as a screening tool to access the suitability of different UV processes for its degradation.

## Supplementary S2 Bond dissociative energy and their corresponding threshold wavelength

Table S1. Bond dissociative energies and corresponding light 'threshold' wavelength.

| Bond                                 | $\Delta E_{298k} (kJ\ mol^{-1})$ | $\lambda_D (nm)$ | Reference |
|--------------------------------------|----------------------------------|------------------|-----------|
| n-C <sub>3</sub> H <sub>7</sub> -H   | 407                              | 294              | [4]       |
| C <sub>6</sub> H <sub>7</sub> -H     | 428                              | 279              | [4]       |
| C <sub>6</sub> H <sub>7</sub> -Cl    | 393.2 (94Kcal $mol^{-1}$ )       | 315*             | [5]       |
| C <sub>6</sub> H <sub>7</sub> -OH    | 428 (110Kcal $mol^{-1}$ )        | 279              | [4]       |
| H <sub>3</sub> C- CH <sub>3</sub>    | 349                              | 343              | [4]       |
| H <sub>3</sub> C-Cl                  | 340                              | 352              | [4]       |
| H <sub>3</sub> C-C(O)CH <sub>3</sub> | 328                              | 365              | [4]       |
| HO-OH                                | 211                              | 568              | [4]       |
| HOCH <sub>2</sub> -H                 | 402.1                            | 298*             | [5]       |
| 1,4-dioxyl-H                         | 383.8                            | 324*             | [5]       |

\*estimated values

## Supplementary S3 Standard Reduction Potentials in Aqueous Medium for degradation of organic compounds

Table S2: Standard reduction potentials of various oxidizing agents in aqueous medium for degradation of organic compounds, adapted from Bard et al. (1985) [6].

| Oxidizing agent                               | Reduction Reaction                                                                   | Standard Potential<br>(E°) (V vs SHE) |
|-----------------------------------------------|--------------------------------------------------------------------------------------|---------------------------------------|
| Hydroxyl radical ( $\bullet\text{OH}$ )       | $\bullet\text{OH} + \text{H}^+ + \text{e}^- \rightarrow \text{H}_2\text{O}$          | 2.80                                  |
| Sulphate radical ( $\text{SO}_4^{\bullet-}$ ) | $\text{SO}_4^{\bullet-} + \text{e}^- \rightarrow \text{SO}_4^{2-}$                   | 2.60                                  |
| Ozone ( $\text{O}_3$ )                        | $\text{O}_3 + 2\text{H}^+ + 2\text{e}^- \rightarrow \text{O}_2 + \text{H}_2\text{O}$ | 2.075                                 |
| Persulphate                                   | $\text{S}_2\text{O}_8^{2-} + 2\text{e}^- \rightarrow 2\text{SO}_4^{\bullet-}$        | 2.01                                  |
| Hydrogen peroxide ( $\text{H}_2\text{O}_2$ )  | $\text{H}_2\text{O}_2 + 2\text{H}^+ + 2\text{e}^- \rightarrow 2\text{H}_2\text{O}$   | 1.763                                 |
| Hydroperoxyl radical                          | $\text{HO}_2^{\bullet} + 3\text{H}^+ + 3\text{e}^- \rightarrow 2\text{H}_2\text{O}$  | 1.65                                  |
| ( $\text{HO}_2^{\bullet}$ )                   | $\text{HO}_2^{\bullet} + \text{H}^+ + \text{e}^- \rightarrow \text{H}_2\text{O}_2$   | 1.44                                  |
| Chlorine ( $\text{Cl}_2$ )                    | $\text{Cl}_2 + 2\text{e}^- \rightarrow 2\text{Cl}^-$                                 | 1.358                                 |

## Supplementary S4 Cost Comparison of various light driven AOPs discussed in this review

$$EE/O = \frac{P \times t \times 1000}{V \times 60 \times \log \frac{C_0}{C_t}}$$

Where:

P = the power input of the UV-lamp, magnetic stirrer, pump, ozone generator (kW)

t = treatment time (min)

V = the volume of the effluent (L)

C<sub>0</sub> = initial concentration of contaminant

C<sub>t</sub> = concentration of pollutant at time t

Using E<sub>EO</sub> allows comparison between systems using different wavelengths and polychromatic spectra. For oxidants (Cl<sub>2</sub>, H<sub>2</sub>O<sub>2</sub> etc. and catalysts (TiO<sub>2</sub>, ZnO etc.), E<sub>EO</sub> can also be applied as the stored electric energy for the treatment processes [7]. Factors that affect E<sub>EO</sub> values include oxidant dose, treatment capacity and the recalcitrant nature of the contaminant.

Table S3: Cost analysis of various light driven AOPs.

| S/N | Process                          | Pollutant                                                  | [CEC]<br>(mg/L) | Reacting<br>Volume (L) | Treatment<br>time (h) | EEO (kWh m <sup>-3</sup> ) | Degradation<br>rate (%) | References |
|-----|----------------------------------|------------------------------------------------------------|-----------------|------------------------|-----------------------|----------------------------|-------------------------|------------|
| 1   | UV/TiO <sub>2</sub>              | Tris-(2-chloroisopropyl) phosphate in synthetic wastewater | 1               | 0.15                   | 0.667                 | 0.000038                   |                         | [8]        |
| 2   | UV/PS                            | Brilliant Green in synthetic wastewater                    | 24.13           | 0.15                   | 2.48                  | 5.4                        | 99.99                   | [9]        |
|     | UV/PMS                           |                                                            |                 |                        | 3.16                  | 6.8                        | 99.99                   |            |
|     | UV/H <sub>2</sub> O <sub>2</sub> |                                                            |                 |                        | 3.6                   | 7.8                        | 99.99                   |            |
| 3   | UV/TiO <sub>2</sub> (Pilot)      | Real pharmaceutical effluent                               | COD = 3680      | 5                      | 2                     | 6.12                       | 80% COD                 | [10]       |
| 4   | UV/Cl <sub>2</sub>               |                                                            | 7.708           | 0.2                    | 0.0833                | 0.4595                     | 100                     | [11]       |

|   |                                                                    |                                                         |                       |      |        |                                                                       |     |      |
|---|--------------------------------------------------------------------|---------------------------------------------------------|-----------------------|------|--------|-----------------------------------------------------------------------|-----|------|
|   | UV/NH <sub>2</sub> Cl                                              | Iopamidol in synthetic wastewater                       |                       |      | 0.0833 | 0.4272                                                                | 100 |      |
|   | UV/ClO <sub>2</sub>                                                |                                                         |                       |      | 0.0833 | 1.1789                                                                | 100 |      |
|   | UV/H <sub>2</sub> O <sub>2</sub>                                   |                                                         |                       |      | 0.0833 | 0.3965                                                                | 100 |      |
| 5 | UV/TiO <sub>2</sub>                                                | Saccharin in synthetic wastewater                       | 5                     | 0.15 | 0.75   | 134.4                                                                 | 54  | [12] |
|   | UV/TiO <sub>2</sub> (LED)                                          |                                                         |                       |      | 0.5    | 8.2                                                                   | 100 |      |
| 6 | UV (LP)                                                            | Various trace organic compounds in synthetic wastewater | 0.1                   | 0.03 | varied | 0.09 - 15.90                                                          | 90  | [13] |
|   | UV (MP)                                                            |                                                         |                       |      |        | 0.09 - 12.22                                                          | 90  |      |
| 7 | UV/Cl <sub>2</sub>                                                 | 28 PPCPs in real/synthetic wastewater                   | 0.001 each            | 0.75 | varied | 0.017 - 2.26 (synthetic wastewater)<br>0.048 - 4.53 (real wastewater) | 90  | [14] |
|   | UV/H <sub>2</sub> O <sub>2</sub>                                   |                                                         |                       |      |        | 0.17 - 2.38 (synthetic wastewater)<br>0.22 - 8.09 (real wastewater)   | 90  |      |
| 8 | UV                                                                 | Synthetic wastewater with 4 micropollutants             | 1.00 each             | 1.2  | 0.333  | 65.5 - 499                                                            | 90  | [15] |
|   | UV/H <sub>2</sub> O <sub>2</sub>                                   |                                                         |                       |      |        | 49.5 - 322                                                            | 90  |      |
|   | UV/O <sub>3</sub>                                                  |                                                         |                       |      |        | 4.75 - 65.3                                                           | 90  |      |
|   | UV/O <sub>3</sub> /H <sub>2</sub> O <sub>2</sub>                   |                                                         |                       |      |        | 5.28 - 44.1                                                           | 90  |      |
| 9 | UV/O <sub>3</sub> /TiO <sub>2</sub>                                | Synthetic wastewater with various VOCs                  | COD: 2100 - 2300 mg/L | 15   | 2      | 280                                                                   | 66  | [16] |
|   | O <sub>3</sub>                                                     |                                                         |                       |      | 1.667  | 150                                                                   | 29  |      |
|   | UV/O <sub>3</sub>                                                  |                                                         |                       |      | 0.25   | 35                                                                    | 43  |      |
|   | UV/O <sub>3</sub> /H <sub>2</sub> O <sub>2</sub> /TiO <sub>2</sub> |                                                         |                       |      | 1      | 247                                                                   | 43  |      |
|   | O <sub>3</sub> /H <sub>2</sub> O <sub>2</sub>                      |                                                         |                       |      | 1      | 106                                                                   | 32  |      |
|   | UV/O <sub>3</sub> /H <sub>2</sub> O <sub>2</sub>                   |                                                         |                       |      | 1      | 156                                                                   | 46  |      |

|    |                                                  |                                                             |                        |       |               |                 |               |      |
|----|--------------------------------------------------|-------------------------------------------------------------|------------------------|-------|---------------|-----------------|---------------|------|
| 10 | O <sub>3</sub>                                   | Groundwater/surface water/sec effluent with micropollutants | 0.001 each             | 9.4   | 0.333         | 0.3             | 33 - 99       | [17] |
|    | Electro-Peroxone                                 |                                                             |                        |       |               | 0.21            | 68 - ~100     |      |
|    | UV/O <sub>3</sub>                                |                                                             |                        |       |               | 2.13            | 76 - ~100     |      |
| 11 | O <sub>3</sub>                                   | Synthetic drinking water with PPCPs                         | 10.00 each             | 1.6   | 0.167         | 7.79 - 13.10    | 66 - 82       | [18] |
|    | UV/O <sub>3</sub>                                |                                                             |                        |       |               | 8.99 - 14.02    | 80 - 100      |      |
|    | UV/O <sub>3</sub> /TiO <sub>2</sub>              |                                                             |                        |       |               | 4.40 - 7.01     | 100           |      |
| 12 | UV/H <sub>2</sub> O <sub>2</sub>                 | Tertiary wastewater effluent                                | Varied (0.021 - 1.813) | 21    | 0.0084        | 0.3741 - 0.8259 | Not discussed | [19] |
|    | UV/Cl <sub>2</sub>                               |                                                             |                        |       |               | 0.1157 - 7.3390 |               |      |
|    | UV/O <sub>3</sub>                                |                                                             |                        |       |               | 0.2145 - 0.3521 |               |      |
|    | UV/O <sub>3</sub> /H <sub>2</sub> O <sub>2</sub> |                                                             |                        |       |               | 0.2854 - 0.3625 |               |      |
|    | UV/O <sub>3</sub> /Cl <sub>2</sub>               |                                                             |                        |       |               | 0.2443 - 0.5371 |               |      |
| 13 | UV/Fenton (UVA)                                  | Synthetic water with valproic acid                          | 50.00                  | 2     | 2             | 26.5            | 100           | [20] |
|    | UV/Fenton (UVC)                                  |                                                             |                        |       |               | 17              | 100x'         |      |
|    | UV/Fenton (Solarbox)                             |                                                             |                        |       |               | *               | 89.7          |      |
| 14 | Solar/Fenton                                     | Synthetic water with 5 PPCPs                                | < 0.1 each             | 22    | Not discussed | 0.85            | 90            | [21] |
|    | Solar/Fenton                                     |                                                             |                        |       |               | 0.82            | 90            |      |
|    | UV/H <sub>2</sub> O <sub>2</sub>                 |                                                             |                        | 15.63 |               | 1.37            | 90            |      |
|    | UV/PDS                                           |                                                             |                        |       |               | 1.3             | 90            |      |
| 15 | UV-Fenton                                        | Synthetic water with carbamazepine                          | 78.2                   | 33    | 2             | 19.18           | 76.2          | [22] |
|    | Solar/Fenton                                     |                                                             |                        |       | 0.432         | 4.39            | 82.5          |      |
|    | UV/Fenton                                        |                                                             |                        |       | 6             | 19.73           | 79.7          |      |
| 16 | Fenton                                           |                                                             | TOC =                  | 0.5   | 1             | -               | 55.61         | [23] |

|    |                                                    |                                 |                 |     |  |      |       |       |
|----|----------------------------------------------------|---------------------------------|-----------------|-----|--|------|-------|-------|
|    | UV/Fenton                                          | Synthetic water with pesticides | 50 – 250 mg/L   |     |  | 4    | 63.76 |       |
|    | Solar/Fenton                                       |                                 |                 |     |  | -    | 58.32 |       |
|    | UV/TiO <sub>2</sub> /H <sub>2</sub> O <sub>2</sub> |                                 |                 |     |  | 5    | 233   | 21.54 |
| 17 | Fenton                                             | Textile wastewater              | COD = 1130 mg/L | 0.5 |  | 1    | 0.89  | 90    |
|    | UV/Fenton                                          |                                 |                 |     |  | 2.33 | 52.75 | 90    |
|    | Solar/Fenton                                       |                                 |                 |     |  | 72   | 0.45  | 90    |

\* The solar box with simulated sunlight was excluded from the cost computation, since solar boxes are energy intensive and does not fully represent the cost potential of natural sunlight.

[24]



## References

- [1] X. Ma *et al.*, "Simultaneous degradation of estrone, 17 $\beta$ -estradiol and 17 $\alpha$ -ethinyl estradiol in an aqueous UV/H<sub>2</sub>O<sub>2</sub> system," *Int. J. Environ. Res. Public Health*, vol. 12, no. 10, pp. 12016–12029, Sep. 2015, doi: 10.3390/ijerph121012016.
- [2] B. Mathon *et al.*, "Ozonation of 47 organic micropollutants in secondary treated municipal effluents: Direct and indirect kinetic reaction rates and modelling," *Chemosphere*, vol. 262, p. 127969, Jan. 2021, doi: 10.1016/j.chemosphere.2020.127969.
- [3] K. Sornalingam, A. McDonagh, and J. L. Zhou, "Photodegradation of estrogenic endocrine disrupting steroidal hormones in aqueous systems: Progress and future challenges," *Science of the Total Environment*, vol. 550, Elsevier, pp. 209–224, Apr. 15, 2016, doi: 10.1016/j.scitotenv.2016.01.086.
- [4] D. Husain, "Photochemistry. J. G. CALVERT and J. N. Pms, JR., John Wiley and Sons Inc.," *Photochem. Photobiol.*, vol. 6, no. 8, pp. 601–601, Aug. 1967, doi: 10.1111/j.1751-1097.1967.tb08762.x.
- [5] G. E. Davico, V. M. Bierbaum, C. H. DePuy, G. B. Ellison, and R. R. Squires, "The C—H Bond Energy of Benzene," *J. Am. Chem. Soc.*, vol. 117, no. 9, pp. 2590–2599, 1995, doi: 10.1021/ja00114a023.
- [6] A. J. Bard, R. Parsons, and J. Jordan, *Standard Potentials in Aqueous Solution*, 1st ed. New York: CRC Press, 2017.
- [7] E. J. Rosenfeldt, K. G. Linden, S. Canonica, and U. von Gunten, "Comparison of the efficiency of \*OH radical formation during ozonation and the advanced oxidation processes O<sub>3</sub>/H<sub>2</sub>O<sub>2</sub> and UV/H<sub>2</sub>O<sub>2</sub>," *Water Res.*, vol. 40, no. 20, pp. 3695–3704, 2006, doi: 10.1016/j.watres.2006.09.008.
- [8] X. Yu, H. Yin, J. S. Ye, H. Peng, G. Lu, and Z. Dang, "Degradation of tris-(2-chloroisopropyl) phosphate via UV/TiO<sub>2</sub> photocatalysis: kinetic, pathway, and security risk assessment of degradation intermediates using proteomic analyses," *Chem. Eng. J.*, vol. 374, pp. 263–273, Oct. 2019, doi: 10.1016/j.cej.2019.05.193.
- [9] F. Rehman, M. Sayed, J. A. Khan, N. S. Shah, H. M. Khan, and D. D. Dionysiou, "Oxidative removal of brilliant green by UV/S<sub>2</sub>O<sub>8</sub><sup>2-</sup>, UV/HSO<sub>5</sub><sup>-</sup> and UV/H<sub>2</sub>O<sub>2</sub> processes in aqueous media: A comparative study," *J. Hazard. Mater.*, vol. 357, no. June, pp. 506–514, 2018, doi: 10.1016/j.jhazmat.2018.06.012.
- [10] P. Bansal, A. Verma, and S. Talwar, "Detoxification of real pharmaceutical wastewater by integrating photocatalysis and photo-Fenton in fixed-mode," *Chem. Eng. J.*, vol. 349, pp. 838–848, Oct. 2018, doi: 10.1016/j.cej.2018.05.140.
- [11] F. X. Tian *et al.*, "Comparison of UV-induced AOPs (UV/Cl<sub>2</sub>, UV/NH<sub>2</sub>Cl, UV/ClO<sub>2</sub> and UV/H<sub>2</sub>O<sub>2</sub>) in the degradation of iopamidol: Kinetics, energy requirements and DBPs-related toxicity in sequential disinfection processes," *Chem. Eng. J.*, vol. 398, no. February, p. 125570, 2020, doi: 10.1016/j.cej.2020.125570.
- [12] K. Davididou, C. McRitchie, M. Antonopoulou, I. Konstantinou, and E. Chatzisyneon, "Photocatalytic degradation of saccharin under UV-LED and

- blacklight irradiation," *J. Chem. Technol. Biotechnol.*, vol. 93, no. 1, pp. 269–276, Jan. 2018, doi: 10.1002/jctb.5349.
- [13] H. W. Yu *et al.*, "Strategies for selecting indicator compounds to assess attenuation of emerging contaminants during UV advanced oxidation processes," *Water Res.*, vol. 166, p. 115030, 2019, doi: 10.1016/j.watres.2019.115030.
  - [14] K. Guo *et al.*, "Comparison of the UV/chlorine and UV/H<sub>2</sub>O<sub>2</sub> processes in the degradation of PPCPs in simulated drinking water and wastewater: Kinetics, radical mechanism and energy requirements," *Water Res.*, vol. 147, pp. 184–194, 2018, doi: 10.1016/j.watres.2018.08.048.
  - [15] N. Wardenier, Z. Liu, A. Nikiforov, S. W. H. Van Hulle, and C. Leys, "Micropollutant elimination by O<sub>3</sub>, UV and plasma-based AOPs: An evaluation of treatment and energy costs," *Chemosphere*, vol. 234, pp. 715–724, 2019, doi: 10.1016/j.chemosphere.2019.06.033.
  - [16] A. Fernandes, M. Gagol, P. Makoś, J. A. Khan, and G. Boczkaj, "Integrated photocatalytic advanced oxidation system (TiO<sub>2</sub>/UV/O<sub>3</sub>/H<sub>2</sub>O<sub>2</sub>) for degradation of volatile organic compounds," *Sep. Purif. Technol.*, vol. 224, no. May, pp. 1–14, 2019, doi: 10.1016/j.seppur.2019.05.012.
  - [17] W. Yao, S. W. Ur Rehman, H. Wang, H. Yang, G. Yu, and Y. Wang, "Pilot-scale evaluation of micropollutant abatements by conventional ozonation, UV/O<sub>3</sub>, and an electro-peroxone process," *Water Res.*, vol. 138, pp. 106–117, 2018, doi: 10.1016/j.watres.2018.03.044.
  - [18] D. Jankunaite and M. Tichonovas, "Removal of Diclofenac, Ketoprofen, and Carbamazepine from Simulated Drinking Water by Advanced Oxidation in a Model Reactor," *Water Air Soil Pollut.*, vol. 228, no. 353, pp. 1–15, 2017, doi: 10.1007/s11270-017-3517-z.
  - [19] M. Sgroi, S. A. Snyder, and P. Roccaro, "Comparison of AOPs at pilot scale: Energy costs for micro-pollutants oxidation, disinfection by-products formation and pathogens inactivation," *Chemosphere*, vol. In press, p. 30, 2020, doi: 10.1016/j.chemosphere.2020.128527.
  - [20] D. H. Funai, F. Didier, J. Giménez, S. Esplugas, P. Marco, and A. Machulek, "Photo-Fenton treatment of valproate under UVC, UVA and simulated solar radiation," *J. Hazard. Mater.*, vol. 323, pp. 537–549, 2017, doi: 10.1016/j.jhazmat.2016.06.034.
  - [21] S. Miralles-cuevas, D. Darowna, A. Wanag, S. Mozia, S. Malato, and I. Oller, "Comparison of UV/H<sub>2</sub>O<sub>2</sub>, UV/S<sub>2</sub>O<sub>8</sub><sup>2-</sup>, solar/Fe(II)/H<sub>2</sub>O<sub>2</sub> and solar/Fe(II)/S<sub>2</sub>O<sub>8</sub><sup>2-</sup> at pilot plant scale for the elimination of micro-contaminants in natural water : An economic assessment," *Chem. Eng. J.*, vol. 310, pp. 514–524, 2017, doi: 10.1016/j.cej.2016.06.121.
  - [22] A. J. Expósito, D. A. Patterson, J. M. Monteagudo, and A. Durán, "Sono-photo-degradation of carbamazepine in a thin falling film reactor : Operation costs in pilot plant," *Ultrason. Sonochem.*, vol. 34, pp. 496–503, 2017, doi: 10.1016/j.ultsonch.2016.06.029.

- [23] A. C. Affam, M. Chaudhuri, and S. R. M. Kutty, "Comparison of Five Advanced Oxidation Processes for Degradation of Pesticide in Aqueous Solution," *Bull. Chem. React. Eng. Catal.*, vol. 13, no. 1, pp. 179–186, 2018, doi: 10.9767/bcrec.13.1.1394.179-186.
- [24] Durr-E-Shahwar, A. Yasar, and S. Yousaf, "Solar assisted photo fenton for cost effective degradation of textile effluents in comparison to AOPs," *Glob. Nest J.*, vol. 14, no. 4, pp. 477–486, 2012, doi: 10.30955/gnj.000804.
